# Supplementary material for: Ferroptosis and HMGB2 induced calreticulin translocation required for immunogenic cell death are controlled by the nuclear exporter XPO1
Source: Research Square preprint supplement (doi:10.21203/rs.3.rs-4009459/v1), 2024-03-05
Supplement: Supplementary file 1 [file 7b462d5c6f97e4564fb3ee6f.docx]

**Supplementary Table 2: Parent ions, product ions and LC retention times of peptides that were used for the quantification of HMGB1 and HMGB2 (K=[13C615N2]-lysine)**

| **Protein** | **HMGB1** | **SILAC-HMGB1** | **HMGB2** |
| --- | --- | --- | --- |
| Peptide | K90DPNAPKRPPSAF102 | **K**90DPNAP**K**RPPSAF102 | S134EQSAKDKQPY144 |
| Parent ion | MH22+ | MH22+ | MH22+ |
| Parent ion (*m/z*) | 712.886 | 720.900 | 640.810 |
| Product ion 1 | y9+ | y9+ | y8+ |
| Product ion 1 (*m/z*) | 970.547 | 978.561 | 936.479 |
| Product ion 2 | y8+ | y8+ | y7+ |
| Product ion 2 (*m/z*) | 899.510 | 907.524 | 849.447 |
| Product ion 3 | y7+ | y7+ | Y6+ |
| Product ion 3 (m/z) | 802.457 | 810.471 | 778.409 |
| LC ret time (min) | 28.1 | 28.1 | 25.0 |
