# Supplementary material for: Ferroptosis and HMGB2 induced calreticulin translocation required for immunogenic cell death are controlled by the nuclear exporter XPO1
Source: Research Square preprint supplement (doi:10.21203/rs.3.rs-4009459/v1), 2024-03-05
Supplement: Supplementary file 2 [file ce84b8d4b4e08ee066892893.docx]

**Supplementary Table 1: Materials, antibodies, and reagents**

| **Reagent** | **Supplier** | **Address** | **Catalog #** |
| --- | --- | --- | --- |
| A549 NSCLC cells | ATCC | Manassas, VA | CCL-247 |
| Ammonium hydroxide | MilliporeSigma | Billerica, MA | 1336-21-6 |
| Calcein AM | Thermo Fisher Scientific | Waltham, MA | 21666 |
| Chymotrypsin endoproteinase MS grade | Thermo Fisher Scientific | Waltham, MA | 90056 |
| Cisplatin | MilliporeSigma | Billerica, MA | PHR1684 |
| Dimethyl pimelimidate (DMP) | Thermo Fisher Scientific | Waltham, MA | 21666 |
| Dimethyl sulfoxide (DMSO) | MilliporeSigma | Billerica, MA | D2650 |
| Dulbecco′s modified Eagle′s medium (DMEM) | Gibco | Brooklyn, NY | 11330032 |
| Dulbecco’s phosphate buffered saline | Thermo Fisher Scientific | Waltham, MA | J67670.AP |
| Eppendorf protein LoBind tubes | MilliporeSigma | Billerica, MA | EP022431102 |
| Formic acid | Thermo Fisher Scientific | Waltham, MA | 36617.36 |
| Gibco Fetal Bovine Serum (FBS) | Thermo Fisher Scientific | Waltham, MA | 10099158 |
| Gibco Trypan Blue, 0.5 % | Thermo Fisher Scientific | Waltham, MA | 15250061 |
| Goat anti-rabbit IgG | Cell Signaling Technology | Danvers, MA | 70745 |
| Goat anti-mouse IgG H&L; Alexa Fluor® 488 | Abcam | Waltham, MA | ab150113 |
| Hank's balanced salt solution | MilliporeSigma | Billerica, MA | H9269 |
| HCT116 colon cancer cells | ATCC | Manassas, VA | CCL-247 |
| HEPES buffer | MilliporeSigma | Billerica, MA | H9269 |
| Hoechst 33342 stain | Thermo Fisher Scientific | Waltham, MA | H1399 |
| Invitrogen nitrocellulose/filter paper sandwich | Thermo Fisher Scientific | Waltham, MA | LC2001 |
| KPT-330 | Santa Cruz Biotechnology | Dallas, TX | G2423 |
| McCoy’s medium | Gibco | Brooklyn, NY | 12330-031 |
| Mem-PER Plus Kit | Thermo Fisher Scientific | Waltham, MA | 89842 |
| Methanol LC/MS grade | Thermo Fisher Scientific | Waltham, MA | 047192.K2 |
| Nunc Lab-Tek chamber slide system | Thermo Fisher Scientific | Waltham, MA | 177380 |
| NuPAGE™ LDS Sample Buffer (4X) | Thermo Fisher Scientific | Waltham, MA | NP0007 |
| Oxaliplatin | Cayman Chemical | Ann Arbor, MI | 13106 |
| Mouse anti-CRT mAb | Abcam | Waltham, MA | ab22683 |
| PE/Cy7 conjugation kit | Abcam | Waltham, MA | ab102903 |
| Penicillin | Gibco | Brooklyn, NY | 15070063 |
| Pierce BCA protein assay kit | Thermo Fisher Scientific | Waltham, MA | 23227 |
| Pierce protein A/G magnetic agarose beads | Thermo Fisher Scientific | Waltham, MA | 78609 |
| Propidium Iodide (PI) | Thermo Fisher Scientific | Waltham, MA | 1304MP |
| Rabbit anti-CRT mAb | Abcam | Waltham, MA | ab22744 |
| Rabbit anti-FASN mAb | Thermo Fisher Scientific | Waltham, MA | MA5-14887 |
| Rabbit anti-E-cadherin mAb (EP700Y) | Thermo Fisher Scientific | Waltham, MA | MA5-14458 |
| Rabbit anti-histone H3 pAb | Thermo Fisher Scientific | Waltham, MA | PA5-16183 |
| Rabbit anti-HMGB1 pAb | Abcam | Waltham, MA | H9539 |
| Rabbit anti-HMGB2 mAb | Abcam | Waltham, MA | ab124670 |
| Subcellular protein fractionation kit | Thermo Fisher Scientific | Waltham, MA | 78840 |
| Trypan blue (0.4 %) | Thermo Fisher Scientific | Waltham, MA | 15250061 |
| Trypsin mass spectrometry grade | Thermo Fisher Scientific | Waltham, MA | 90057 |
| Trypsin for cell trypsinization | Thermo Fisher Scientific | Waltham, MA | 15400054 |
| Water LC/MS grade | Thermo Fisher Scientific | Waltham, MA | 51140 |
| Western Lightning Plus ECL reagent. | Revvity | Waltham, MA | NEL103E001EA |
